# Supplementary material
Source: publisher figshare collection journal article supplement (https://acs.figshare.com/ndownloader/files/3624429)
Supplement: Supplementary file 1 [file 3624429]

**Supporting Information**  
for  
**Coverage-Dependence of Methanol Dissociation on  
TiO<sub>2</sub>(110)**

Shuo Liu,<sup>1, 4, †</sup> An-an Liu,<sup>1, 4, †</sup> Bo Wen,<sup>1, 2, †</sup> Ruidan Zhang,<sup>1, 4</sup> Chuanyao Zhou,<sup>3</sup>  
Li-Min Liu,<sup>2, \*</sup> Zefeng Ren<sup>1, 4, \*</sup>

1) International Center for Quantum Materials (ICQM) and School of Physics, Peking University, Beijing 100871, P. R. China

2) Beijing Computational Science Research Center, Beijing, 100094 P. R. China

3) State Key Laboratory of Molecular Reaction Dynamics, Dalian Institute of Chemical Physics, Chinese Academy of Sciences, 457 Zhongshan Road, Dalian 116023, Liaoning, P. R. China

4) Collaborative Innovation Center of Quantum Matter, Beijing 100871, P. R. China

<sup>†</sup>These authors contributed equally to this work.

\*To whom all correspondence should be addressed.

Email address: [limin.liu@csrc.ac.cn](mailto:limin.liu@csrc.ac.cn), [zfren@pku.edu.cn](mailto:zfren@pku.edu.cn)

---

### Fitting procedure of the SFG vibrational spectra

The SFG intensity is given by

$$I_{SFG} \propto \left| A_{NR} + \sum_q \frac{A_q e^{i\Phi_q}}{\omega_{IR} - \omega_q + i\Gamma_q} \right|^2 I_{Vis} I_{IR} \propto N^2 |\beta|^2 \quad (S1)$$

where  $A_{NR}$  is nonresonance amplitude;  $A_q$ ,  $\Phi_q$ ,  $\omega_q$ ,  $\Gamma_q$  are the resonant amplitude, phase, frequency and damping constant (half width at half maximum) of the  $q$ -th mode, respectively;  $N$  is the number density of adsorbates;  $\beta$  is the second-order molecular hyperpolarizability, which is proportional to the IR and Raman transition moments of vibration modes. All the SFG spectra were normalized to the SFG generated from the bare  $\text{TiO}_2(110)$  surface by flashing at 700 K to remove absorbed species on the surface.

For a Lorentzian line, the peak area is proportional to  $A_q^2/\Gamma$ . So the number density of adsorbates  $N$  can be obtained from

$$N \propto A_q / \sqrt{\Gamma} \quad (S2)$$

The strong power of focused probing laser could possibly affect the adsorbates state, like multiple photon absorption, local heating and so on, which are required to be excluded in our measurements. Therefore, power-dependent *ssp* SFG on 1 layer CH<sub>3</sub>OH on TiO<sub>2</sub>(110) was performed by reducing both visible and IR power. As illustrated in Figure S2, within the error of measurements, probing laser didn't affect the adsorption state of CH<sub>3</sub>OH.

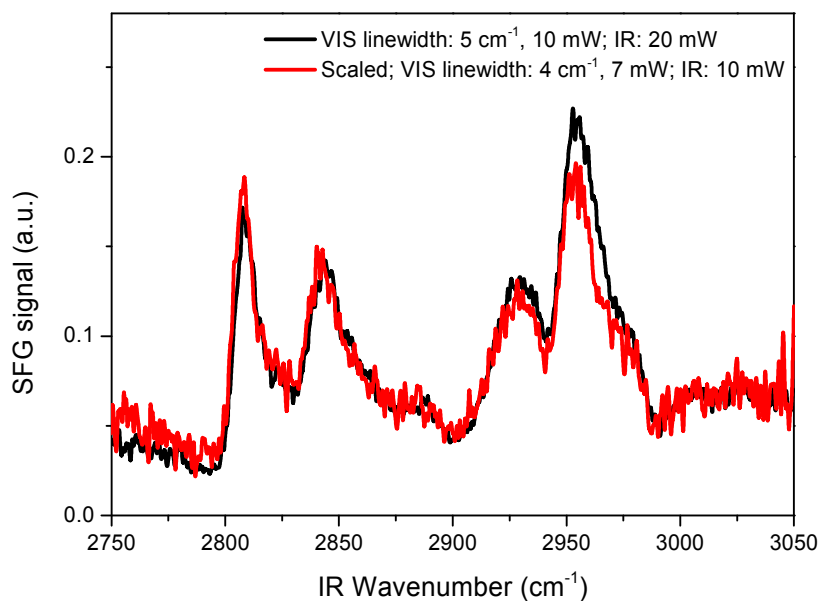

**Figure S1.** Power-dependent *ssp* SFG measurements of 1 layer CH<sub>3</sub>OH on TiO<sub>2</sub>(110). The black curve corresponds to visible slit set as 0.4 mm (line width 5.5 cm<sup>-1</sup>, 10 mW) and IR power at about 20 mW, and the red curve corresponds to visible slit set as 0.3 mm (line width 4.5 cm<sup>-1</sup>, 7.5 mW) and IR power at about 10 mW reduced by a silicon plate at 0° incidence.

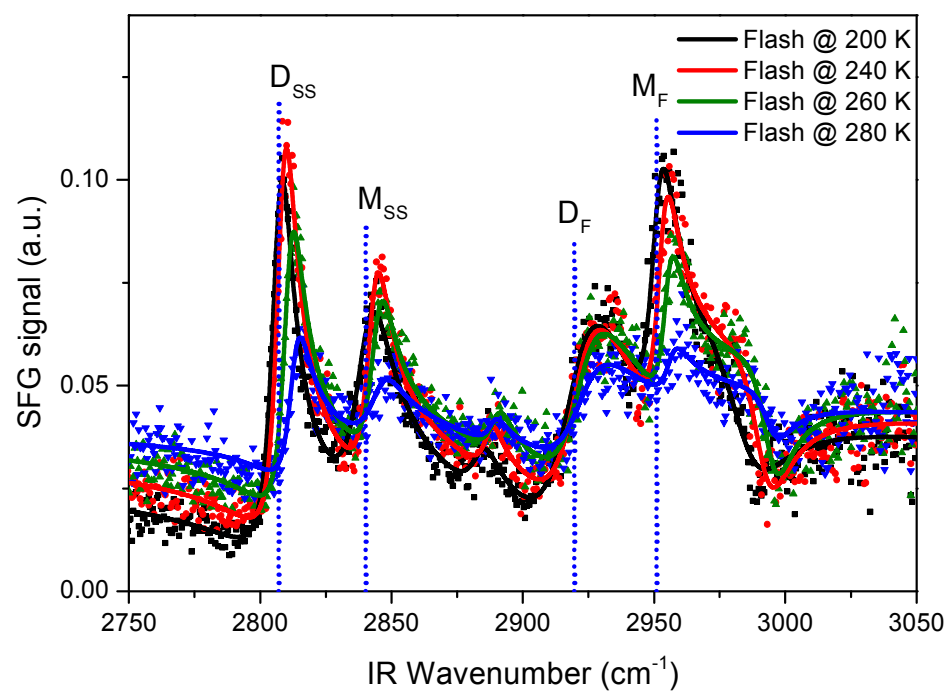

**Figure S2.** Replotting of Figure 1 for showing a clearer trend of nonresonance. Obviously, the nonresonance becomes stronger when the sample was flashed at higher temperature, which leads to less adsorbates on the surface.

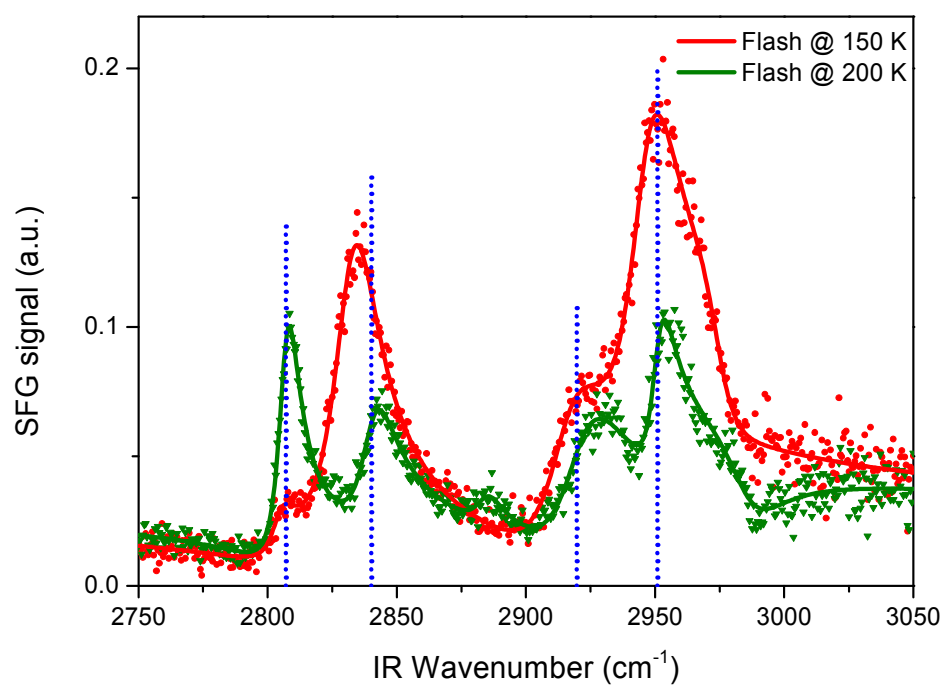

**Figure S3.** Replotting of the SFG spectra in Figure 4 with flashing temperature of 150 K and 200 K to compare the peak at about 2890  $\text{cm}^{-1}$ .

**Table S1.** The fitting results of SFG spectra in Figure 1 and 3. Fitting errors are shown with 95% confidence level. Some phases for different spectra were set as the same in the fitting. The spectra for 140 K is complicated, so some values were set as fixed, and some fitting values reach the setting bound.

|                                    | 280 K            | 260 K            | 240 K            | 200 K            | 160 K            | 150 K             | 140 K            |
|------------------------------------|------------------|------------------|------------------|------------------|------------------|-------------------|------------------|
| $A_{NR}$                           | $0.28 \pm 0.002$ | $0.28 \pm 0.003$ | $0.26 \pm 0.003$ | $0.24 \pm 0.005$ | $0.25 \pm 0.01$  | $0.24 \pm 0.01$   | $0.23 \pm 0.004$ |
| $A_1$                              | $0.58 \pm 0.08$  | $1.01 \pm 0.07$  | $1.33 \pm 0.08$  | $1.43 \pm 0.09$  | $0.89 \pm 0.26$  | $0.45 \pm 0.31$   | --               |
| $A_2$                              | $0.43 \pm 0.12$  | $0.65 \pm 0.08$  | $0.84 \pm 0.09$  | $1.27 \pm 0.15$  | $2.60 \pm 0.29$  | $3.81 \pm 0.28$   | $6.34 \pm 0.06$  |
| $A_3$                              | $0.10 \pm 0.08$  | $0.19 \pm 0.10$  | $0.19 \pm 0.10$  | $0.26 \pm 0.13$  | --               | --                | --               |
| $A_4$                              | $1.09 \pm 0.19$  | $1.55 \pm 0.20$  | $1.94 \pm 0.24$  | $2.71 \pm 0.34$  | $2.84 \pm 0.54$  | $2.66 \pm 0.62$   | $7.4 \pm 0.25$   |
| $A_5$                              | $0.20 \pm 0.10$  | $0.42 \pm 0.08$  | $0.68 \pm 0.10$  | $0.87 \pm 0.12$  | $2.07 \pm 0.38$  | $3.55 \pm 0.64$   | $4.44 \pm 0.28$  |
| $A_6$                              | $0.21 \pm 0.08$  | $0.60 \pm 0.10$  | $0.89 \pm 0.14$  | $1.10 \pm 0.25$  | $0.96 \pm 0.45$  | $1.00 \pm 0.39$   | $0.24 \pm 0.04$  |
| $\Phi_1$                           | $0.48 \pm 0.05$  |                  |                  |                  | $6.20 \pm 0.20$  |                   | --               |
| $\Phi_2$                           | $0.60 \pm 0.09$  |                  |                  |                  | $0.74 \pm 0.10$  | $0.56 \pm 0.07$   | 0.6 (fixed)      |
| $\Phi_3$                           | $1.09 \pm 0.39$  |                  |                  |                  | --               | --                | --               |
| $\Phi_4$                           | $0.18 \pm 0.12$  |                  |                  |                  | $0.10 \pm 0.16$  |                   | $4.97 \pm 0.06$  |
| $\Phi_5$                           | $0.41 \pm 0.12$  |                  |                  |                  | $0.84 \pm 0.19$  | $0.54 \pm 0.18$   | $6.15 \pm 0.09$  |
| $\Phi_6$                           | $4.13 \pm 0.10$  |                  |                  |                  | $3.93 \pm 0.37$  | $3.20 \pm 0.31$   | $5.58 \pm 0.31$  |
| $\omega_1$<br>( $\text{cm}^{-1}$ ) | $2813.0 \pm 1.7$ | $2811.0 \pm 0.7$ | $2808.5 \pm 0.6$ | $2807.1 \pm 0.3$ | $2804.2 \pm 1.0$ | $2804.0 \pm 1.75$ | --               |
| $\omega_2$<br>( $\text{cm}^{-1}$ ) | $2845.1 \pm 0.8$ | $2844.5 \pm 0.8$ | $2843.2 \pm 0.8$ | $2840.5 \pm 0.8$ | $2836.1 \pm 0.9$ | $2832.1 \pm 0.5$  | $2831.3 \pm 0.1$ |
| $\omega_3$<br>( $\text{cm}^{-1}$ ) | $2890.4 \pm 3.2$ | $2891.1 \pm 2.5$ | $2888.7 \pm 2.2$ | $2885.5 \pm 2.6$ | --               | --                | --               |
| $\omega_4$<br>( $\text{cm}^{-1}$ ) | $2923.2 \pm 1.9$ | $2923.0 \pm 1.5$ | $2921.9 \pm 1.4$ | $2920.4 \pm 1.4$ | $2916.8 \pm 1.9$ | $2915.0 \pm 1.75$ | $2901.4 \pm 3.7$ |
| $\omega_5$<br>( $\text{cm}^{-1}$ ) | $2955.9 \pm 1.8$ | $2954.9 \pm 0.7$ | $2952.8 \pm 0.6$ | $2950.8 \pm 0.6$ | $2950.8 \pm 1.0$ | $2946.2 \pm 1.2$  | $2942.8 \pm 0.3$ |

|                                   |                 |                 |                 |                 |                 |                 |                  |
|-----------------------------------|-----------------|-----------------|-----------------|-----------------|-----------------|-----------------|------------------|
| $\omega_6$<br>(cm <sup>-1</sup> ) | 2997.6 ±<br>1.7 | 2994.9 ±<br>1.1 | 2992.0 ±<br>1.2 | 2986.0 ±<br>1.7 | 2980.8 ±<br>3.9 | 2974.0 ±<br>2.5 | 2961.6 ±<br>0.92 |
| $\Gamma_1$<br>(cm <sup>-1</sup> ) | 5.1 ± 0.9       | 4.9 ± 0.4       | 4.8 ± 0.3       | 5.0 ± 0.3       | 5.4 ± 1.0       | 5.7 ± 2.8       | --               |
| $\Gamma_2$<br>(cm <sup>-1</sup> ) | 8.7 ± 2.8       | 5.7 ± 0.9       | 5.6 ± 0.7       | 8.4 ± 1.0       | 11.3 ± 1.0      | 11.2 ± 0.7      | 5.1 ± 0.1        |
| $\Gamma_3$<br>(cm <sup>-1</sup> ) | 4.5 ± 4.5       | 5.1 ± 3.0       | 4.5 ± 2.6       | 5.8 ± 3.2       | --              | --              | --               |
| $\Gamma_4$<br>(cm <sup>-1</sup> ) | 14.3 ±<br>2.8   | 13.6 ±<br>1.9   | 13.6 ±<br>1.6   | 15.5 ±<br>1.7   | 15.6 ±<br>2.2   | 14.6 ±<br>2.4   | 20 (bound)       |
| $\Gamma_5$<br>(cm <sup>-1</sup> ) | 5.8 ± 3.2       | 4.6 ± 1.0       | 5.0 ± 0.7       | 5.6 ± 0.7       | 9.0 ± 1.0       | 12.3 ± 1.3      | 9.3 ± 0.4        |
| $\Gamma_6$<br>(cm <sup>-1</sup> ) | 5.4 ± 2.5       | 6.6 ± 1.4       | 8.4 ± 1.5       | 13.0 ±<br>2.8   | 12.4 ± 4.3      | 10.4 ± 2.7      | 4 (bound)        |

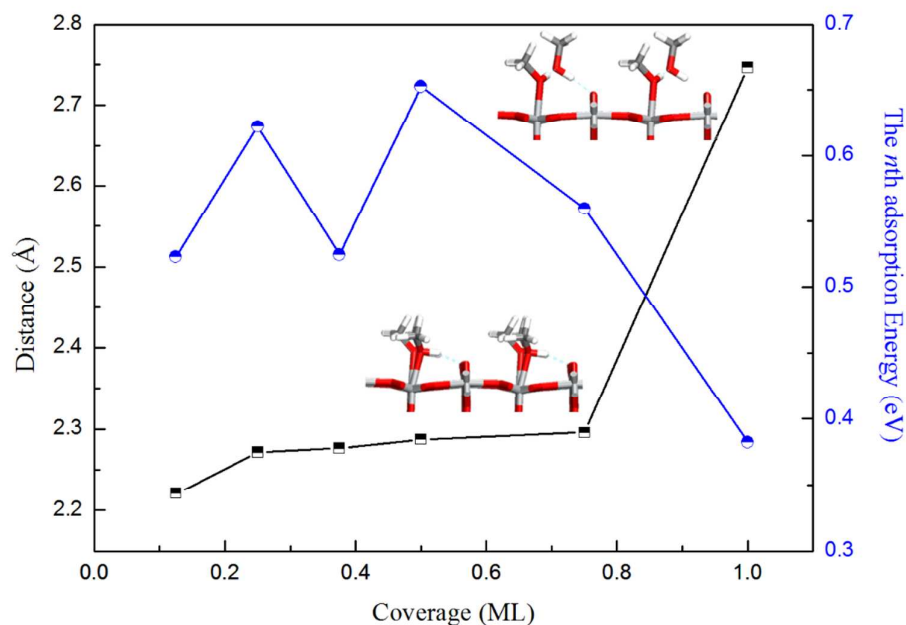

**Figure S4.** Relation of the average methanol-surface distance (left Y axis, black line) and the  $n^{\text{th}}$  adsorption energy (right Y axis, blue line) to the methanol coverage. The distance is calculated between the oxygen atom of methanol and the nearest titanium atom on the surface. Atomic structures (stick mode) of 3/4 and 1 ML coverage are shown in the inset.

Figure S4 shows the relation of the average methanol-surface distance and the  $n^{\text{th}}$  adsorption energy to the methanol coverage. At 1/8 ML, the calculated adsorption energy is about 0.52 eV. As increasing the coverage to 1/4 ML, the two methanol prefers to adsorb nearby to form a dimer. The third methanol does not like to stay with the same Ti trough with the previous two because of the repulsion, and it occupies another trough. The fourth one stays beside the third one to form another dimer. The 5<sup>th</sup> and 6<sup>th</sup> methanol molecules stay the aforementioned Ti trough, respectively, and the adsorption energy for each methanol is about 0.50 - 0.60 eV.



**Table S2.** The adsorption energies of different dissociated configurations in Figure S5.

| <i>Configurations</i>        | <i>Adsorption energy (eV)</i> |
|------------------------------|-------------------------------|
| 3/4 ML CH <sub>3</sub> OH    | 0.57                          |
| 3/4 ML CH <sub>3</sub> OH-1d | 0.55                          |
| 3/4 ML CH <sub>3</sub> OH-2d | 0.55                          |
| 3/4 ML CH <sub>3</sub> OH-3d | 0.51                          |
| 3/4 ML CH <sub>3</sub> OH-4d | 0.47                          |

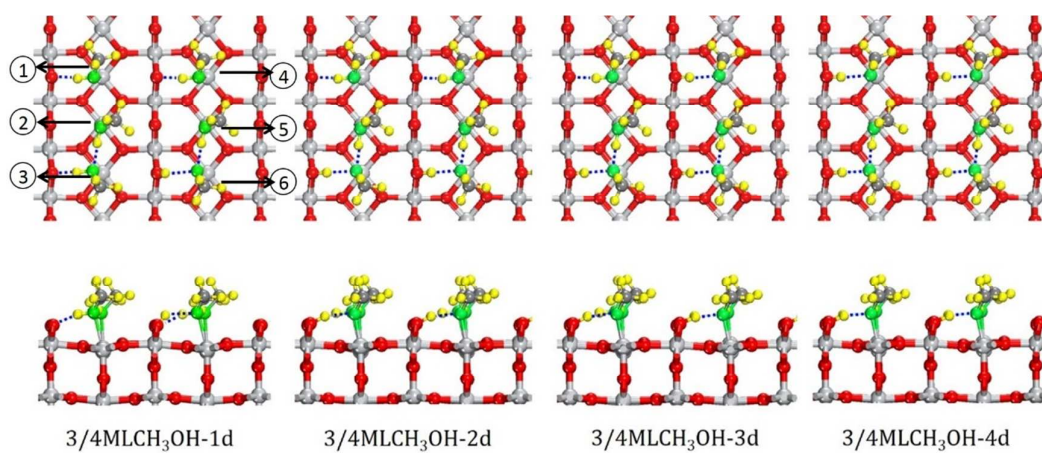

**Figure S5.** Top and side views of different adsorption configurations of 3/4 ML methanol in the first layer. Dashed lines represent hydrogen bonds.

**Table S3.** Polar angles  $\theta$  of the  $C_{3v}$  symmetry axis of the  $CH_3$  group relative to the surface normal  $[110]$  and azimuth angles  $\phi$  relative to the  $Ti_{5c}$  row  $[001]$  on the surface from the calculation results. The number ①-⑥ indicate the position of methanol or methoxy in Figure S5.

| Structure |   | $C_{3v}\angle[110]$ | $C_{3v}\angle[001]$ |   | $C_{3v}\angle[110]$ | $C_{3v}\angle[001]$ |
|-----------|---|---------------------|---------------------|---|---------------------|---------------------|
| 3/4 ML    | ① | 51.2                | 15.4                | ④ | 50.0                | 15.6                |
|           | ② | 44.2                | 64.9                | ⑤ | 44.1                | 65.8                |
|           | ③ | 45.7                | 26.0                | ⑥ | 45.0                | 24.2                |
| 3/4 ML-1d | ① | 51.1                | 15.2                | ④ | 51.2                | 15.6                |
|           | ② | 44.0                | 65.0                | ⑤ | 43.3                | 62.0                |
|           | ③ | 45.5                | 26.2                | ⑥ | 44.6                | 30.8                |
| 3/4 ML-2d | ① | 51.0                | 15.0                | ④ | 51.0                | 15.0                |
|           | ② | 43.1                | 61.4                | ⑤ | 43.1                | 61.3                |
|           | ③ | 44.9                | 30.0                | ⑥ | 45.0                | 29.7                |
| 3/4 ML-3d | ① | 51.2                | 16.6                | ④ | 48.0                | 13.7                |
|           | ② | 43.0                | 62.5                | ⑤ | 42.3                | 60.3                |
|           | ③ | 44.2                | 32.0                | ⑥ | 44.0                | 31.0                |
| 3/4 ML-4d | ① | 47.8                | 14.7                | ④ | 47.7                | 14.7                |
|           | ② | 42.2                | 60.3                | ⑤ | 42.2                | 60.3                |
|           | ③ | 43.9                | 31.0                | ⑥ | 43.8                | 30.9                |

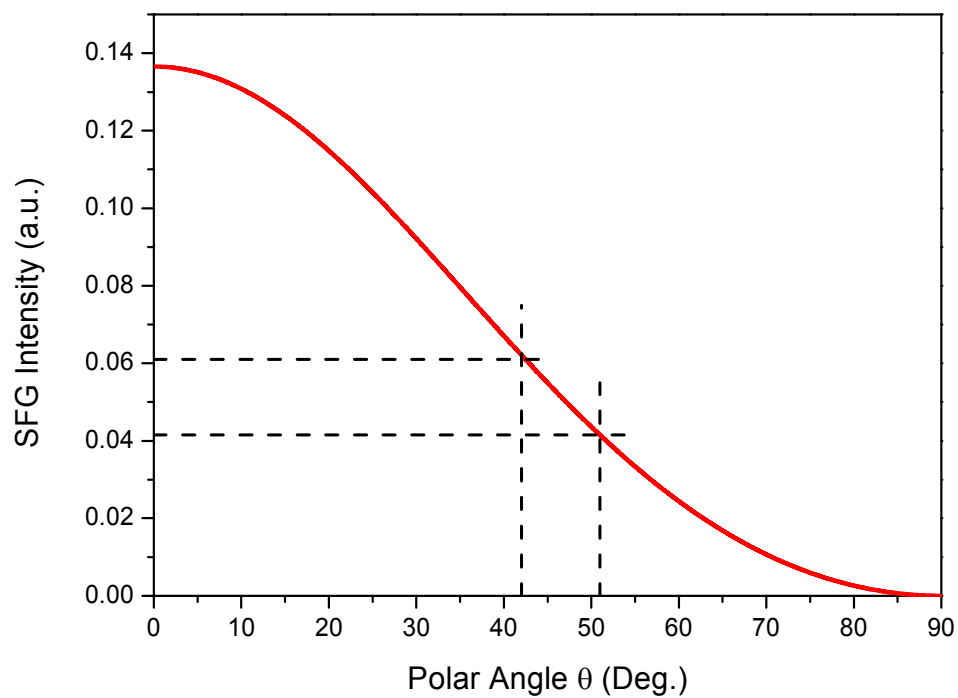

**Figure S6.** SFG signal in *ssp* polarization combination for  $\nu_s$  vibrational modes of the  $\text{CH}_3$  group against its polar angle. The vertical dashed lines correspond to the polar angle range of  $\text{CH}_3$  group at 3/4 ML coverage shown in Figure S5.

In order to know whether the slab is thick enough to represent the methanol adsorption, the adsorption energy of methanol on 4, 6 and 8 layers  $\text{TiO}_2$  at the coverage of  $1/8$  ML were checked, respectively. The dissociated methanol (methoxy) is more stable than the molecular methanol by 0.04 eV, 0.06 eV and 0.06 eV for 4, 6 and 8 layers  $\text{TiO}_2$ , respectively. Such results suggest that these two states can coexist at the low coverage considering the small energy difference between them. Meanwhile, the 4 layers substrate is thick enough to represent the methanol adsorption states on  $\text{TiO}_2(110)$  in the current study.

It should be noted that the electronic structure usually is affected by the  $U$  value used in the calculations.  $U=4.2$  eV is widely used for the  $\text{TiO}_2$  system, which can give the reasonable electronic structure as shown in the previous work.<sup>55, 64</sup> In order to check whether the different  $U$  values can affect the relative stabilities between the molecular and dissociate methanol at the coverage of  $1/8$  ML, the extra calculations with  $U$  values of 5 eV and 3 eV were carried out. The calculated results show that the dissociated methanol (methoxy) is more stable than the molecular methanol by 0.07 eV with  $U=5$  eV and by 0.04 eV with  $U=3$  eV, which is close to 0.04 eV with  $U=4.2$  eV. All the results suggest the energy difference between these two states is quite small no matter what  $U$  is used, thus the molecular and dissociated states should coexist at the low coverage. In the following,  $U=4.2$  eV is used excepted we noted.
